# Supplementary material for: Microbial metabolite OAA from Romboutsia ilealis controls obesity and lipid metabolism through PSMD3-mediated degradation of YTHDF2
Source: Research Square preprint supplement (doi:10.21203/rs.3.rs-6512177/v1), 2025-05-09
Supplement: Supplementary file 1 [file 8047b52f2eaded92600ee411.docx]

**Supporting Information for**

The *Romboutsia lealis* and derived 2-oxindole-3-aceic acid regulates obesity-associated lipid accumulation via PSMD3-mediated YTHDF2 deubiquitination

Luoyi Zhu1,2,3,4, *, Liang Huang1,3,4, *, Shuqi Liu1,3,4, Shiqi Luo1,3,4, Yige Li1,3,4, and Xin Zong1,3,4

* These authors contributed equally to this work.

Corresponding author: Xin Zong

Email: zongxin@zju.edu.cn

**This PDF file includes:**

Figs. S1 to S8

Tables S1 to S3

Supplementary MATERIALS AND METHODS

**Fig. S1 The relative abundance of *R. ilealis* negatively correlated with metabolism index. A** *R. ilealis* relative abundance in health and T2D (type 2 diabetes). **B**–**D** Correlation analysis of *R. ilealis* with body weight (**B**), serum TG (triglyceride) (**C**) and serum TC (total cholesterol). Data were shown as mean ± SEM. ****, *P* < 0.0001.

**Fig. S2 Effect of *R. ilealis* on serum biochemical parameters. A** Serum TC (total cholesterol), HDL (high density lipoprotein) and LDL (low density lipoprotein) levels in ND (normal diet), HFD (high fat diet) and HFD+*R. ilealis* groups (*n* = 6). **B** Serum ALT (alanine aminotransferase) and AST (aspartate aminotransferase) levels in ND, HFD and HFD+*R. ilealis* groups (*n* = 6). Data were shown as mean ± SEM. *, *P* < 0.05, **, *P* < 0.01 and ***, *P* < 0.001.

**Fig. S3 *R. ilealis* exerted no effect on energy metabolism in mice. A**–**B** Dynamic curve graphs and scatter plots of O2 consumption and RER (respiratory exchange ratio) in mice of ND (normal diet), HFD (high fat diet) and HFD+*R. ilealis* groups. Data were shown as mean ± SEM. *, *P* < 0.05, **, *P* < 0.01 and ***, *P* < 0.001.

**Fig. S4 The relative abundance of** ***R. ilealis* in the CON and HR groups.** The abundance of *R. ilealis* in HR (high concentration *R. ilealis*) and CON groups were detected by 16S rRNA sequencing (*n* =7). Data were shown as mean ± SEM.

**Fig. S5 The effect of *R. ilealis* on gut microbiota.** **A** α diversity of gut bacteria on OTU level (*n* = 7). **B** PCoA (Principal Coordinate Analysis) plot of β-diversity on OTU level based on weighted-unifrac index (*n* = 7).

**Fig. S6 Effect of OAA on the viability of IPEC-J2 cells.** Cell viability of IPEC-J2 incubated with a range of 0~100 μM OAA (*n* = 5). Data were shown as mean ± SEM. *, P < 0.05, **, P < 0.01, ***, P < 0.001.

**Fig. S7 Results of molecular coupling with biotin and pull-down.** **A, B** Spectrum plot report (**A**) and H-NMR (Proton Nuclear Magnetic Resonance) (**B**) of coupling. **C** Silver staining using pull-down eluent or input. **D** Spectrum plot report of negative control and biotin labeled OAA pull-down assay.

B

A


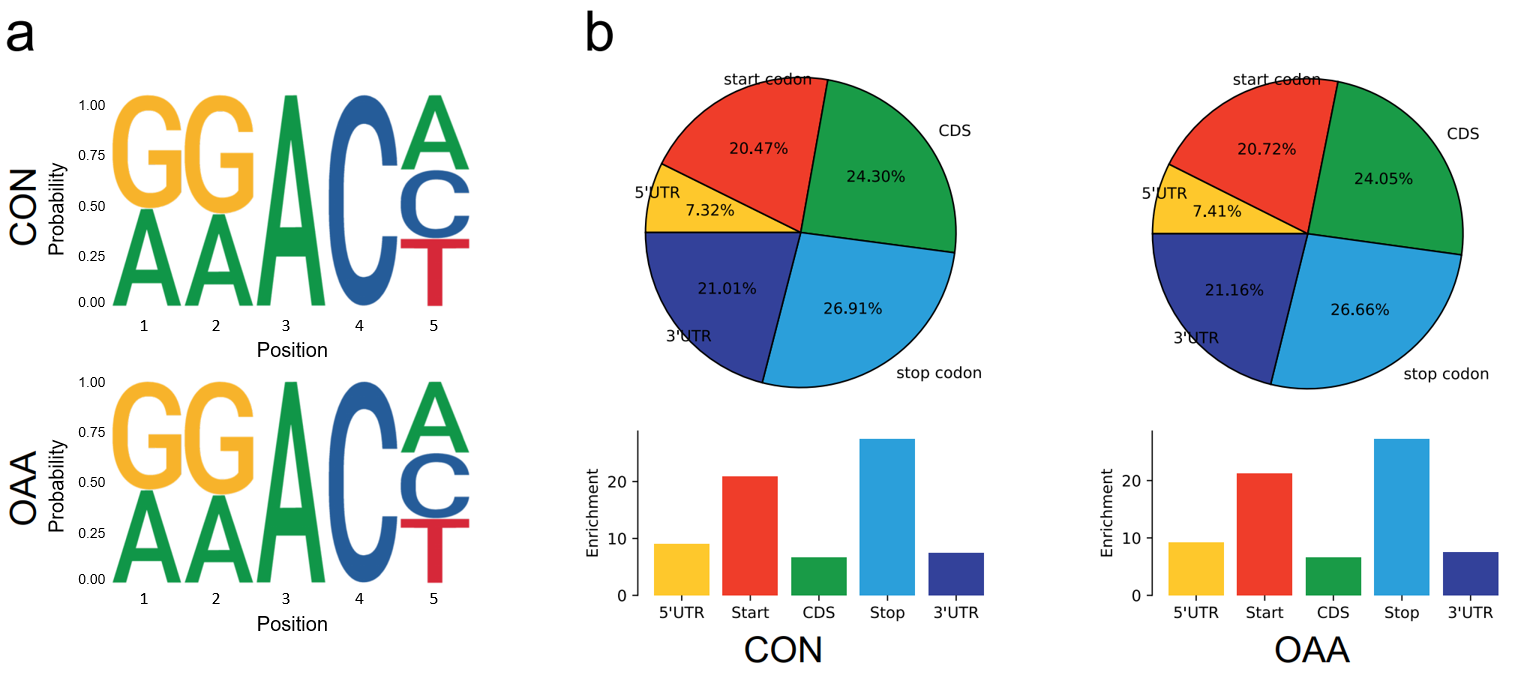


**Fig. S8 Distribution of m6A Peak in gene and its functional regions.** **A** Motif of m6A methylation site. **B** Distribution of m6A methylation site peaks in different regions of gene. *n* =3.

**Table S1 Diet ingredient composition and nutrient contents.**

|  | Normal diet | | High fat diet | |
| --- | --- | --- | --- | --- |
| Ingredient | g/kg | kcal/kg | g/kg | Kcal/kg |
| Casein | 189.57 | 758.29 | 258.46 | 1033.86 |
| L-Cystine | 2.84 | 11.37 | 3.88 | 15.51 |
| Corn Starch | 479.81 | 1919.24 | 0.00 | 0.00 |
| altodextrin 10 | 118.48 | 473.93 | 161.54 | 646.16 |
| Sucrose | 65.21 | 260.85 | 88.91 | 355.65 |
| Cellulose BW200 | 47.39 | 0.00 | 64.62 | 0.00 |
| Soybean Oil | 23.70 | 213.27 | 32.31 | 290.77 |
| Lard | 18.96 | 170.62 | 316.62 | 2849.57 |
| Mineral Mix | 9.48 | 0.00 | 12.92 | 0.00 |
| DiCalcium Phosphate | 12.32 | 0.00 | 16.80 | 0.00 |
| Calcium Carbonate | 5.21 | 0.00 | 7.11 | 0.00 |
| Potassium Citrate,1 H2O | 15.64 | 0.00 | 21.32 | 0.00 |
| Vitamin Mix | 9.48 | 37.91 | 12.92 | 51.69 |
| Choline Bitartrate | 1.90 | 0.00 | 2.58 | 0.00 |
| FD&C Yellow Dye #5 | 0.04 | 0 |  |  |
| FD&C Blue Dye #1 | 0.01 | 0 | 0.05 | 0.00 |
| Total | 1000 | 3845.5 | 1000 | 5243.22 |

**Table S2 Primers Sequences of Genes.**

| Gene names | Primers (5’-3’) |
| --- | --- |
| *Il-6* (*mus*) | F: ACAGAAGGAGTGGCTAAGGA  R: AGGCATAACGCACTAGGTTT |
| *Tnf-α* (*mus*) | F: CGCTGAGGTCAATCTGC  R: GGCTGGGTAGAGAATGGA |
| *iNos* (*mus*) | F: GTGGTGACAAGCACATTTGG  R: AAGGCCAAACACAGCATACC |
| *Ccl2* (*mus*) | F: GGGATCATCTTGCTGGTGAA  R: AGGTCCCTGTCATGCTTCTG |
| *Ccl5* (*mus*) | F: TGCTTTGCCTACCTCTCC  R: CACACACTTGGCGGTTC |
| *Adipoq* (*mus*) | F: TGCTTTGGTCCCTCCAC  R: AGTGCCATCTCTGCCATC |
| *Cd36 (mus)* | F: AGATGACGTGGCAAAGAACAG  R: CCTTGGCTAGATAACGAACTCTG |
| *Fabp2* (*mus*) | F: TGCTGTCCGAGAGGTTTCTG  R: AGAATCGCTTGGCCTCAACT |
| *Fatp4* (*mus*) | F: CAGTCACCCAGACAAGGGTT  R: ATCCCCACGATGTTTCCTGCT |
| *β-actin*（*mus*） | F: GGCGGACTGTTACTGAGCTG  R: TGCTCCAACCAACTGCTGTC |
| *Cd36* (*sus*) | F: CCTTCACTGTTCTCAATCTGG  R: TGTGGTAGGAATAGGGTATGG |
| *Fabp2* (*sus*) | F: GATGAAATGGTCCAGACTTAC  R: ATCCTCTTGGCTTCTACTCCT |
| *Fatp4* (*sus*) | F: AGTGCTCACTGTCCACTCTG  R: TTCTGTAGCTTGAAAGTCCCTGT |
| *Npc1l1* (*sus*) | F: CAGCGGGATTCTGTCCT  R: CTGGTGTTGTGTGGGTTG |
| *Rxrb* (*sus*) | F: atgtcttgggcggctc  R: tcaggccagctggtg |
| *Hspa1b* (*sus*) | F: atggcgaagagcgtg  R: ctaatccacctcctcgatgg |
| *β-actin*（*sus*） | F: GAAGCTGTGATGGACGCAGG  R: CCTGGAGAGGTTCACCGGAA |

**Table S3 Primers used in constructing plasmids.**

| Plasmids | Gene names (species) | Primers (5’–3’) |
| --- | --- | --- |
| pcDNA3.1-PSMD3-MYC | PSMD3 (*sus*) | F: atgaagcaggagggctcgg R: tcaagggaagctgtcgtcgtc |
| pcDNA3.1-YTHDF2-FLAG | YTHDF2 (*sus*) | F: atgtcggccagcagcctc R:ttatttcccacgaccttgacgttcc |
| pcDNA3.1-RXRB-MYC | RXRB (*sus*) | F: atgtcttgggcggctc R: tcaggccagctggtg |
| pcDNA3.1-HSPA1B-MYC | HSPA1B (*sus*) | F: atggcgaagagcgtg R: ctaatccacctcctcgatgg |
| pLKO.1-PSMD3-sh1 | shPSMD3 (*sus*) | F: cctcaaccactatgttctgta R: tacagaacatagtggttgagg |
| pLKO.1-PSMD3-sh2 | shPSMD3 (*sus*) | F: ccatgaggtttcctcccaaat R: atttgggaggaaacctcatgg |

**Supplementary MATERIALS AND METHODS**

**HE staining**

The proximal jejunum, iWAT and eWAT were fixed in 4% paraformaldehyde for more than 24 h. The tissue blocks were removed and trimmed, followed by the steps of dehydration and transparency, dipping and wax embedding, sectioning and patching, dewaxing, hematoxylin-eosin staining to produce the sections. The size of adipocytes after HE staining was quantified using Image J software (NIH Image, USA).

**Oil Red O staining**

The jejunal tissues embedded in OCT compound were frozen and made into sections (8 µm), which were subsequently rewarmed at room temperature for 10 min after slide mounting, followed by fixation in 4% paraformaldehyde solution for 10 min, dyeing with Oil Red O solution (Sigma, O1391) protected from light for 10 min, staining in 60% isopropanol, washing, and counterstaining with hematoxylin for 5 min. Sections were acquired using a Leica DM3000 microscope (Leica, Germany).

**Measurement of biochemical index**

The triglyceride (TG) levels were assayed according to the instructions of the Triglyceride Kit (Nanjing Jiancheng Biological Engineering Research Institute, A110-1-1). The levels of total cholesterol (TC), high-density lipoprotein (HDL), low-density lipoprotein (LDL), as well as the liver enzymes alanine aminotransferase (ALT) and Aspartate aminotransferas (AST), were accurately determined utilizing the Hitachi 7600-020 (Japan) automated clinical biochemistry analyzer.

**Glucose tolerance test (GTT) and insulin tolerance test (ITT)**

Glucose tolerance test (GTT) and insulin tolerance test (ITT) methods as previously described[1]. Glucose solution (Aladdin, D639737) concentration were used at 2 g/kg body weight and insulin solution (Aladdin, 11070-73-8) were at 0.75 U/kg body weight.

**Quantitative real time PCR (qRT-PCR)**

As previously described[2], RNA was extracted utilizing Trizol reagent (Takara, T9108) RNA was removed from genomic DNA and reverse transcribed into cDNA (Takara, RR047A). qRT-PCR was performed using primers for the target genes (Table S2) and a SYBR Green-based reaction system (Roche, 4913914001) on a StepOne Plus RT-PCR system (Applied Biosystems, USA).

**Western blot analysis**

Western blot determinations were carried out by the approach that we described previously[3]. The antibodies used in this study were shown as follows: CD36 (Abcam, ab252922), FATP4 (Abcam, ab200353), FABP2 (Abcam, ab128860), PSMD3 (Proteintech, 12054-1-AP), YTHDF2 (ABclonal, A24287), RXRB (Proteintech,14684-1-AP), HSPA1B (ABclonal, A19317), β-actin (Huabio, M1210-2 and R1207-1), horseradish peroxidase (HRP)-conjugated secondary antibodies goat anti-rabbit (Huabio, HA1001) and goat anti-mouse (Huabio, HA1006).

**Jejunum contents** **16S rRNA gene sequencing**

16S rRNA gene sequencing was performed as previously reported with minor modifications[4]. The QIAamp DNA Stool Mini Kit (Qiagen, Hilden, Germany) was utilized for the extraction of intestinal bacterial DNA specifically from jejunal contents. The PCR-amplified region was the V3-V4 region of 16S rDNA (338F: ACTCCTACGGGGGGGGCAGCA, 806R: GACTACHVGGGTWTCTAAT). The amplification products were construction by 2% gel electrophoresis and then retrieved by axyprep DNA gel extraction kit (Axygen, USA). The PCR products were identified and quantified using QuantiFluor™-ST microfluorometer (Promega, Madison, WI, USA) for subsequent library construction. Miseq sequencing was performed on Illumina MiSeq platform (Illumina, Madison, USA). The PE reads obtained from Miseq sequencing were spliced, quality controlled and filtered. Then, cluster analysis was performed according to the degree of sequence similarity, clean sequences with a degree of similarity greater than 97% were classified into an operational taxonomic unit (OTU).

The data presented in Figure S1 were sourced from the publicly accessible NCBI database, comprising data from previously published studies of ours. [4, 5].

**Non-targeted metabolomics**

For sample preparation and UHPLC-MS/MS analysis, 50 mg of fecal samples were accurately weighed into 400 μL of extraction solution (methanol: water = 4:1 (v: v)) containing 0.02 mg/mL of internal standard (L-2-chlorophenylalanine). The samples were extracted by low-temperature sonication at 5°C, 40 KHz for 30 min and rested at -20°C for 30 min. Subsequently, the supernatants were extracted by centrifugation at 4°C, 13,000 g for 15 min, then the supernatants were analyzed by LC-MS/MS on a UHPLC-Q Exactive HF-X system equipped with an ACQUITY HSS T3 column (100 mm × 2.1 mm i.d., 1.8 μm; Waters, USA). The mobile phases consisted of 0.1% formic acid dissolved in water: acetonitrile (95: 5, v/v), designated as solvent A. 0.1% formic acid dissolved in acetonitrile: isopropanol: water (47.5: 47.5: 5, v/v/v) (solvent B). The flow rate was maintained at 0.40 mL/min and the column temperature was set at 40 ℃. The sample mass spectrometry signals were acquired in positive and negative ion scanning modes with a mass scan range of 70-1050 m/z. Data were collected in DDA mode.

For data analysis, the pretreatment of LC-MS raw data was imported into the metabolomics processing software Progenesis QI (Waters Corporation, Milford, USA) to obtain a data matrix of retention times, MS ratios and peak intensities. The metabolites were matched with the metabolic public databases HMDB (http://www.hmdb.ca/) and Metlin (https://metlin.scripps.edu/). The normalized data matrix was subjected to Principal Component Analysis (PCA) and Orthogonal Partial Least Squares Discriminant Analysis (OPLS-DA) using the “ropls package” (Version 1.6.2) in R. The stability of the model was assessed by using 7-cycles interactive validation evaluating. The identification of significantly different metabolites was determined based on the Variable importance in the projection (VIP) obtained by the OPLS-DA model and the *p*-value generated by student’s t test. Differential metabolites between the two groups were mapped to their biochemical pathways by metabolic enrichment and pathway analysis based on the KEGG database (<http://www>. genome.jp/kegg/). Finally, the correlation of the differential metabolites with *R. ilealis* as well as serum TG and TC was determined by Spearman's correlation analysis, the correlation heatmap was plotted using R version 4.0.5.

**co-IP/MS**

Co-immunoprecipitation was performed following the manufacturer’s protocol using Pierce Crosslink Magnetic IP/Co-IP Kit (Thermo Scientific), with PSMD3, YTHDF2, FLAG and, MYC protein antibody (Proteintech). The beads sample were send to Majorbio (Shanghai, China) for mass spectrum.

**m6A dot plot**

Collect IPEC-J2 cells that have been incubated with 25μM 2-oxindole-3-acetic acid for 24h, then extract the total RNA. Add 3.5 μg total RNA into tubes, supply Nuclease-free water to 5 μL, heat the sample at 95 ℃ for 3 min, then place them on the ice. The denatured total RNA was spot samples on a nylon membrane, the nylon membrane was placed on a dry filter paper, and the RNA was cross-linked to the membrane by a violet cross-linking instrument with 1200 J energy each time. The membranes were washed with 1×PBST solution (PBS containing 1/1000 Tween), then blocked with 5% skim milk powder prepared with PBST for 1.5 h. Incubation with m6A primary antibody at room temperature for 1 h or overnight. Wash the membranes with 1×PBST solution for 3 times, 10 min each time; Incubation with secondary antibody for 1.5 h at room temperature and wash the membranes using PBST for 3 times, then visualization. Next, the membranes were stained with methylene blue for 10 min and washed using water, visualization at last.

**m6A Elisa assay**

Extract total RNA from IPEC-J2 cells that have been incubated with 25μM 2-oxindole-3-acetic acid for 24h using Trizol (Beyotime Biotechnology). m6A level was determined following manufacturer’s protocol using EpiQuik m6A RNA Methylation Quantification Kit (EPIGENTEK).

**MeRIP-seq**

Building library: Extract total RNA and detect concentration and integrity, break total RNA as sections about 100nt, and divide each sample into 2 group (input or IP). Enrich m6A modified RNA using m6A specific antibody, eluting beads to decrease background noise. Next, building library of 2 group for each sample, the libraries that passed the quality test were sequenced. Data filtering and quality assessment: In order to ensure data quality, the original data should be filtered before information analysis to reduce analysis interference caused by invalid data. Firstly, we used fastp for quality control of raw reads, filtered low quality data (see below for filtering standards), and obtained clean reads. Steps of reads filtering as following: reads containing adapters were removed; reads containing more than 10% N were removed; reads with all A-bases were removed; remove low quality reads (the number of bases with quality value Q ≤ 20 accounts for more than 50% of the whole read). Ribosome alignment: The short reads alignment tool bowtie2 was used to align high quality clean reads to the ribosome database of this species, and the reads on the aligned ribosomal RNA were removed. Genome alignment: HISAT2 uses global and local search methods to effectively align spliced reads in RNA-Seq sequencing data, which is currently the most accurate alignment software with the highest alignment rate. Reference genome-based alignment analysis was performed with the use of HISAT2 software. Next using Integrative Genomics Viewer (IGV) for visualization. Peak statistics for grouped samples: The R package exomePeak2 was used to perform genome-wide peak calling on a group basis, with a default threshold of *p* value<1e-5. The location information of the peak on the genome and the sequence information of the peak region were analyzed, and the peak-related genes were screened out and functional enrichment analysis was performed. According to the region information of the peak in the genome and the annotation information of the genes, the peak-related genes were obtained.

**Bodipy C16 uptake analysis**

***In vivo*:** Mice were fasted for 6 h and then gavaged with 200 mL of olive oil containing 0.2 μg/mL of Bodipy C16 (Invitrogen, D3821). 2 h later, the whole small intestine of the mice was removed, the contents were quickly and gently washed out with 4% paraformaldehyde. The intestines were rotated into a flat surface from inside to outside and immersed in 4% paraformaldehyde fixative for 20 min, after which bright- and dark-field images were taken under a stereo fluorescence microscope (Nikon, Japan).

The photographed intestine was re-fixed with OCT. Briefly, the intestinal lumen was injected with OCT embedding agent and ensured that there were no air bubbles in the intestinal lumen, which was again coiled into a flat surface. After freezing at -80°C, the slices (7 μm) obtained in a Cryostat Microtome (Leica, Germany) were observed for fluorescence intensity under a stereo fluorescence microscope. The above experimental procedures were carried out under light-avoidance conditions.

***In vitro*:** Cells were inoculated into laser confocal petri dishes (NEST, 801002), the relevant experiments were carried out once the cells reached 50-60%. Briefly, the cells were serum-starved with FBS-free medium for at least 8 h followed by incubation with Bodipy C16 solution for 10 min. The Bodipy C16 solution was then completely discarded and the cells were washed twice (2 min each time) with PBS containing 0.5% BSA. Finally, the cells were photographed under a confocal microscope (Olympus, Japan) and the cell fluorescence intensity was counted using Image J software.

**Molecular docking**

Molecular docking was performed using Autodock. PSMD3 protein PDB document was download from PDBe-KB (<https://www.ebi.ac.uk/pdbe/pdbe-kb/proteins/O43242>), while 2-oxindole-3-acetic acid SDF file was obtained from PubChem (<https://pubchem.ncbi.nlm.nih.gov/>) and then transform to PDB format using Open Babel GUI. After molecular docking for 50 times, the result was chosen from the top 10 compounds with lowest bind free energy, finally visualized on the Pymol.

**Molecular dynamic simulation**

Molecular dynamic simulation was carried out using Gromacs. 2-oxindole-3-acetic acid molecular topology file was obtained from Automated Topology Builder (ATB, <http://atb.uq.edu.au/index.py>), while PSMD3 protein topology was calculated in Gromacs. The compound coordinates were made from molecular docking, based on these, the compound topology was assembled on Gromacs. Then molecular dynamic simulation was performed. In brief, the basic process as following: building box, solvation, charge balance, system energy minimization, temperature and pressure balance, choosing density and, dynamic simulation.

**Isothermal Titration Calorimetry (ITC) Assay**

The compounds RU, QU, HY, QI, and KA were dissolved in a 5% ethanol solvent and loaded into the syringes of the VP-ITC system (MicroCal; Malvern Panalytical, Malvern, UK). Meanwhile, an aqueous solution containing α-glucosidase at a concentration of 20 μM, also prepared in 5% ethanol, was placed in the ITC cell. The thermal titration experiment was conducted at a constant temperature of 25 °C, with 28 drops, an agitator speed of 394 rpm, and a reference power of 10.00 μcal/s. The interval between injections was set at 180 seconds. Subsequently, the raw data peaks were analyzed to generate a plot depicting the molar ratio versus the enthalpy change per mole for the injected solution.

**Culture and preparation of *R. ilealis***

To activate and propagate the *Romboutsia ilealis* strain (DSMZ, DSM25109), Ampoules containing the dried powder were carefully cracked in a sterile anaerobic incubator (ELECTROTEK, UA). Afterwards, 500 µL of medium (DSMZ Medium 110a) was added gently and mixed thoroughly for bacterial activation and passaging. After three consecutive passages, bacteria were grown in 200 mL flasks under anaerobic conditions for 16 hours. The viability of the bacteria was checked by methylene blue staining, the bacteria were resuspended in PBS at concentrations of 108 and 109 CFU/mL used for gavage.

**Metabolic cage**

The mice were subjected to measurements of O2 consumption, CO2 production, respiratory exchange ratio, food intake, and energy expenditure using a Comprehensive Lab Animal Monitoring System (CLAMS) equipped with Oxymax software (version 4.10) (Columbus Instruments, Columbus, OH, USA). Dynamic curve graphs and bar charts were generated from the collected data. Prior to the recording, the mice were acclimatized in the cages for at least 24 hours. Mice were acclimatized to their cages for at least 24 hours before the start of recordings. Each mouse was placed in an individual metabolic cage with intelligent control of temperature and light for ad libitum feeding and drinking[6].

**IPEC-J2 Cell Culture**

The resuscitated IPEC-J2 cells were cultured in DMEM/F12 complete medium (Gibco, 1320033) containing 10% FBS (Gibco, A5670701), 100 IU/mL penicillin, and 100 μg/mL streptomycin at 37°C, 5% CO2 concentration, and 100% humidity. IPEC-J2 cells were digested with trypsin and passaged when the cells reached 80-90% growth, and the medium was changed once a day. The cell viability was determined according to the instructions of the Cell Counting Kit-8 (Yeasen, 40203ES60).

**Gene knock out/down cell lines**

All plasmids used in the study were listed in Table S3. Full-length sequences of pig *RXRB*, *HSPA1B*, *PSMD3*, were amplified with gene-specific primers listed in Table S3. Vectors (pcDNA3.1-FLAG or pcDNA3.1-MYC) were cut into linearized sections using restriction enzyme Hind III (NEB). Utilizing seamless cloning kit (Beyotime Biotechnology), the DNA sections of genes above were loaded into vectors.

YTHDF2-KO IPEC-J2 cell line was obtained from Ubigene (Guangzhou, China). PSMD3 knock down IPEC-J2 cell line were obtained using pLKO.1 lentivirus system which encoding shRNA of PSMD3 (nucleic acid sequence see Table S3).

**Molecular pull-down assay**

This experiment was executed by ZooNBIO BIOTECHNOLOGY (Nanjing, China). In brief, 2-oxindole-3-acetic acid was coupling with Amino biotin, determined the coupling results according to mass spectrum (result was shown in Fig. S7). After coupling the compound with beads, incubated with IPEC-J2 lysate and then precipitation was performed using a magnetic rack, next rinsed, eluted, and the product were used for LC-MS/MS.

**Quantitative real time PCR (qRT-PCR)**

As previously described[2], RNA was extracted utilizing Trizol reagent (Takara, T9108) RNA was removed from genomic DNA and reverse transcribed into cDNA (Takara, RR047A). qRT-PCR was performed using primers for the target genes (Table S2) and a SYBR Green-based reaction system (Roche, 4913914001) on a StepOne Plus RT-PCR system (Applied Biosystems, USA).

**Western blot analysis**

Western blot determinations were carried out by the approach that we described previously[3]. The antibodies used in this study were shown as follows: CD36 (Abcam, ab252922), FATP4 (Abcam, ab200353), FABP2 (Abcam, ab128860), PSMD3 (Proteintech, 12054-1-AP), YTHDF2 (ABclonal, A24287), RXRB (Proteintech,14684-1-AP), HSPA1B (ABclonal, A19317), β-actin (Huabio, M1210-2 and R1207-1), horseradish peroxidase (HRP)-conjugated secondary antibodies goat anti-rabbit (Huabio, HA1001) and goat anti-mouse (Huabio, HA1006).

**CETSA (Cellular Thermal Shift Assay)**

IPEC-J2 was incubated with 25μM 2-oxindole-3-acetic acid at 70% confluence for 24h. Cells were collected by trypsin digestion. Wash and resuspend cells using PBS (with 1% PMSF), after cell counting, cells were divided into 9 tubes each with 1 ⅹ106 counts. Then heat cells at 37~67 ℃ in thermal cycler for 3 min. Next add NP40 lysate, lysis for 5min. Freeze-thaw was repeated three times, add protein loading buffer and boil the protein sample at 95 ℃ for 10 min. Determine the PSMD3 protein expression by western blot.

1. You W, Xu Z, Sun Y, Valencak TG, Wang Y, Shan T. GADD45α drives brown adipose tissue formation through upregulating PPARγ in mice. 2020, **11**(7)**:** 585.

2. Zong X, Xiao X, Shen B, Jiang Q, Wang H, Lu Z*, et al.* The N6-methyladenosine RNA-binding protein YTHDF1 modulates the translation of TRAF6 to mediate the intestinal immune response. 2021, **49**(10)**:** 5537-5552.

3. Zong X, Zhao J, Wang H, Lu Z, Wang F, Du H*, et al.* Mettl3 Deficiency Sustains Long-Chain Fatty Acid Absorption through Suppressing Traf6-Dependent Inflammation Response. *Journal of immunology (Baltimore, Md : 1950)* 2019, **202**(2)**:** 567-578.

4. Zhu L, Fu J, Xiao X, Wang F, Jin M, Fang W*, et al.* Faecal microbiota transplantation-mediated jejunal microbiota changes halt high-fat diet-induced obesity in mice via retarding intestinal fat absorption. 2022, **15**(1)**:** 337-352.

5. Li Q, Chang Y, Zhang K, Chen H, Tao S, Zhang Z. Implication of the gut microbiome composition of type 2 diabetic patients from northern China. *Scientific reports* 2020, **10**(1)**:** 5450.

6. Talukdar S, Oh DY, Bandyopadhyay G, Li D, Xu J, McNelis J*, et al.* Neutrophils mediate insulin resistance in mice fed a high-fat diet through secreted elastase. *Nature medicine* 2012, **18**(9)**:** 1407-1412.
