# Supplementary figures and images for: Microbial metabolite OAA from Romboutsia ilealis controls obesity and lipid metabolism through PSMD3-mediated degradation of YTHDF2
Source: Research Square preprint supplement (doi:10.21203/rs.3.rs-6512177/v1), 2025-05-09

**







**

**Fig. 2J**

**







**

**Fig. 4F**

**
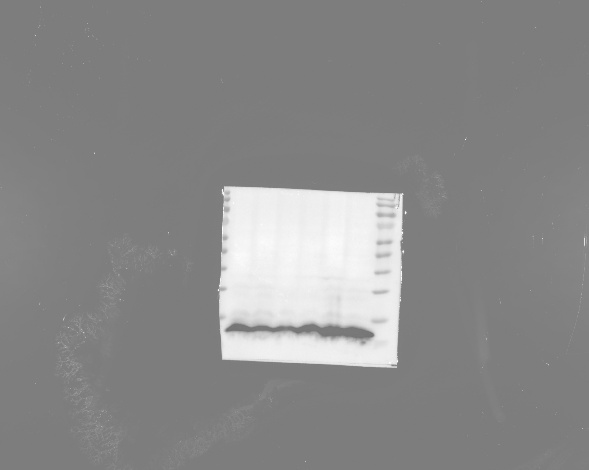

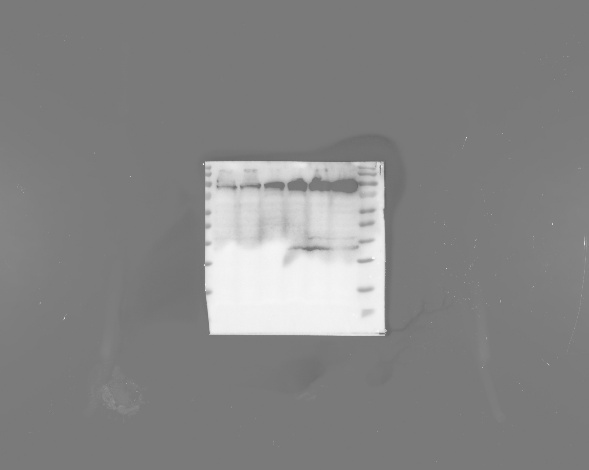

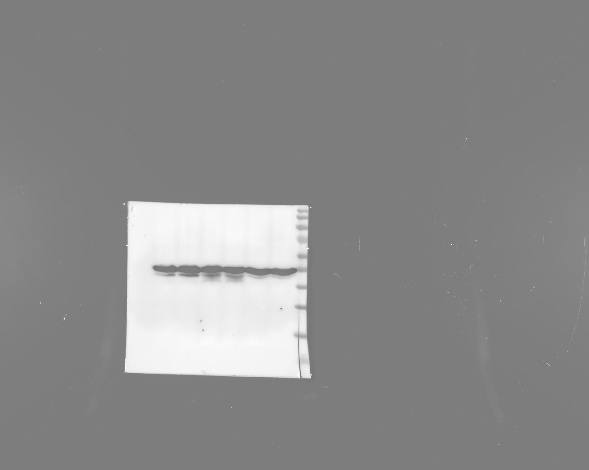
**

**Fig. 4N**

**
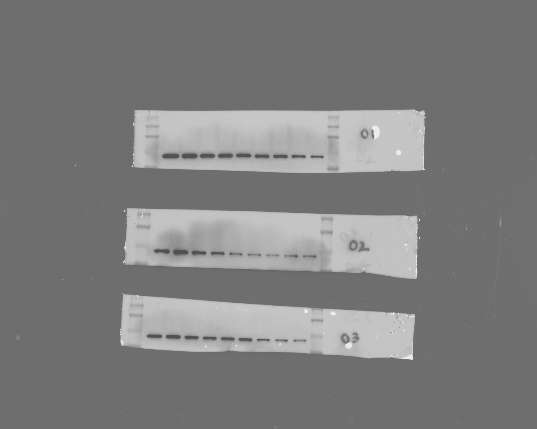

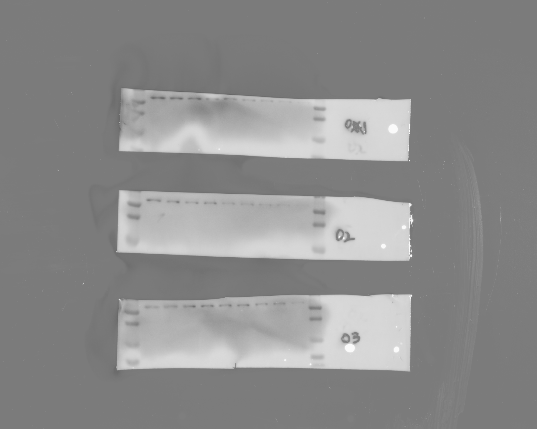

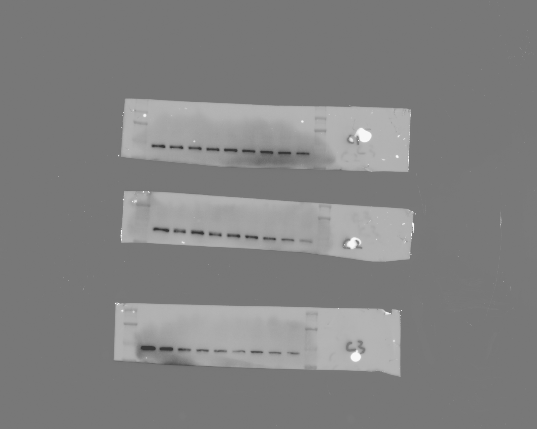

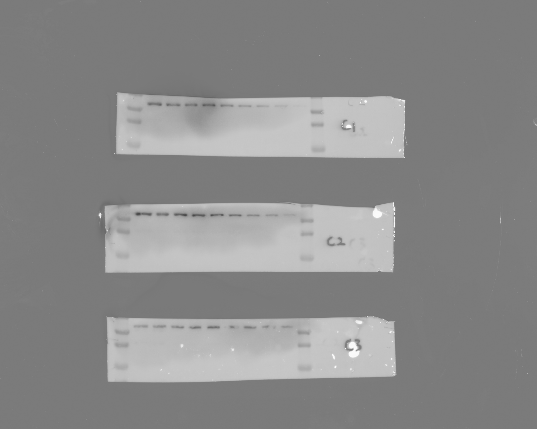
**

**Fig. 5I**

**
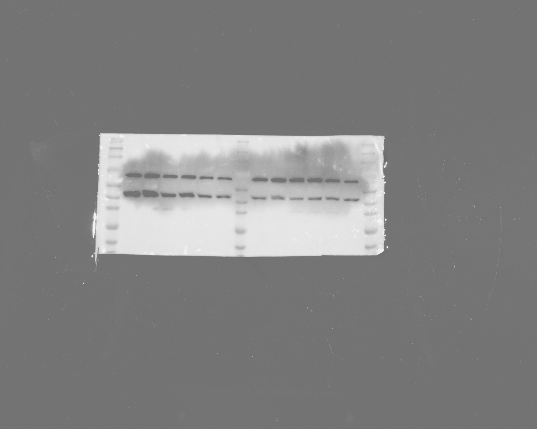

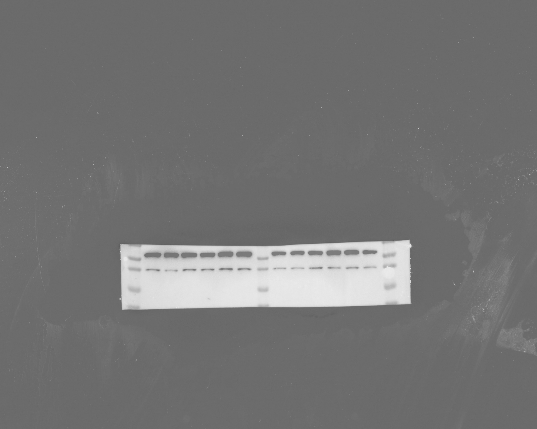
**

**Fig. 5J**

**
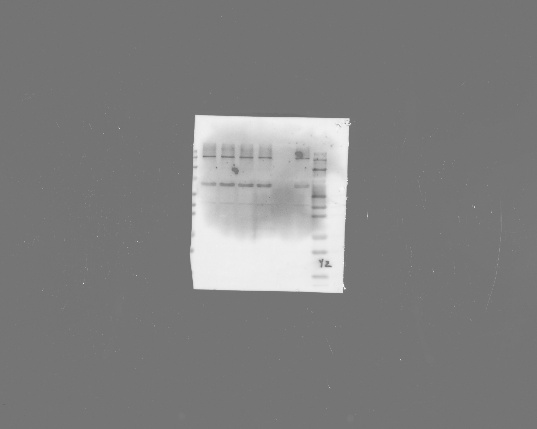

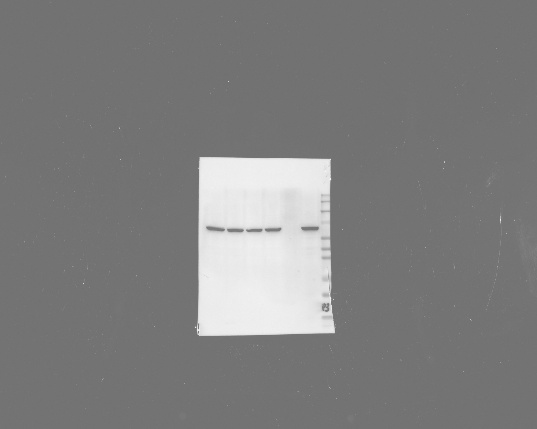
**

**Fig. 6D**

**


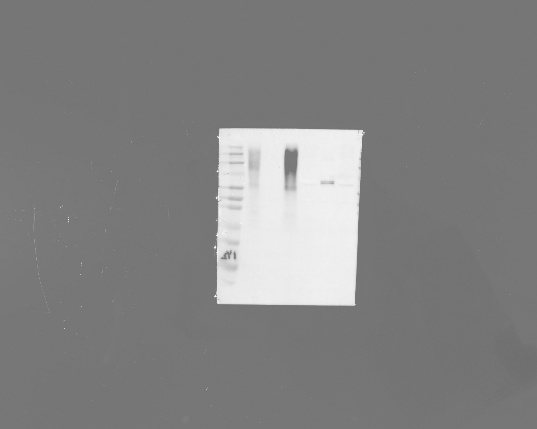

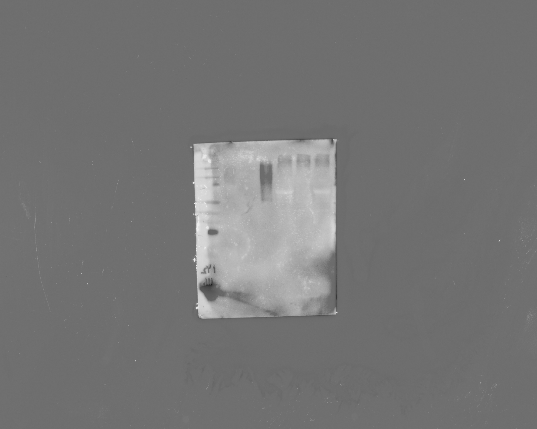
**

**Fig. 6E**

**
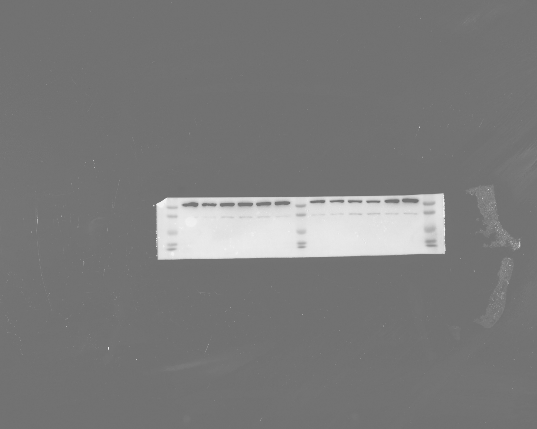

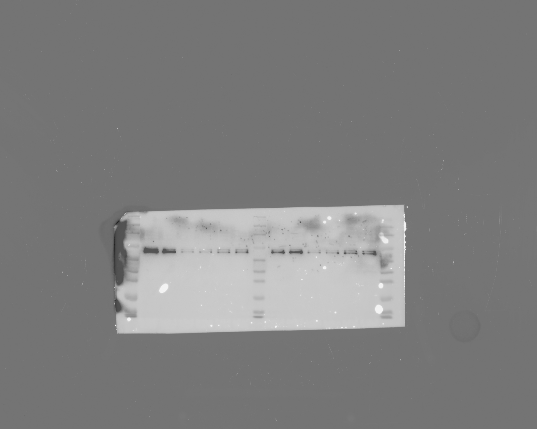
**

**Fig. 6F**

**


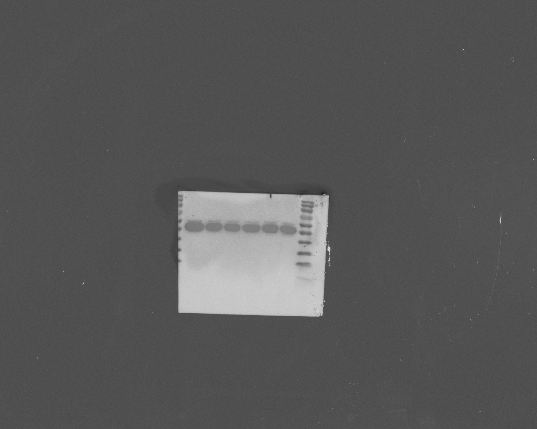
**

**Fig. 6G**

**
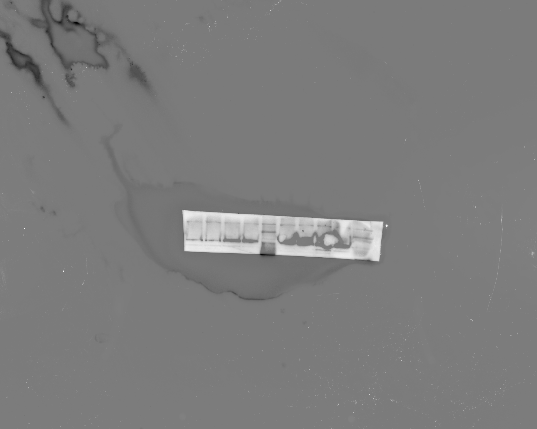

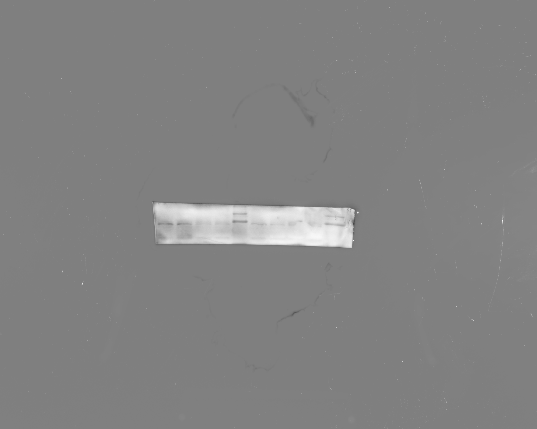

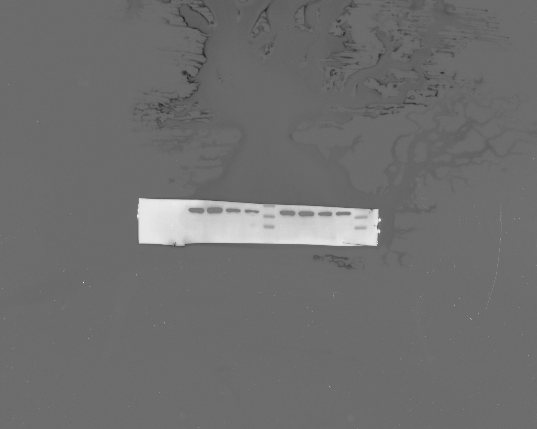
**

**Fig. 6L**

**
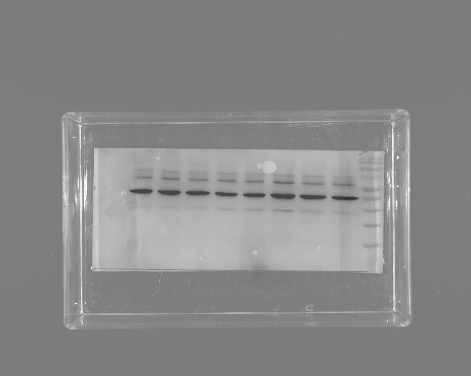

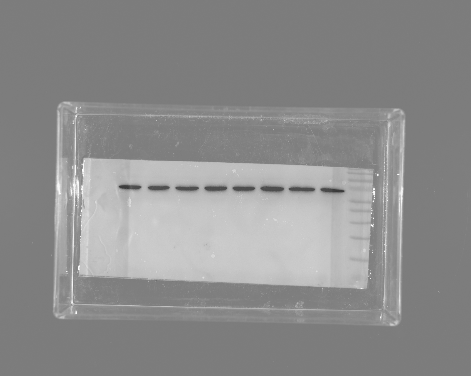

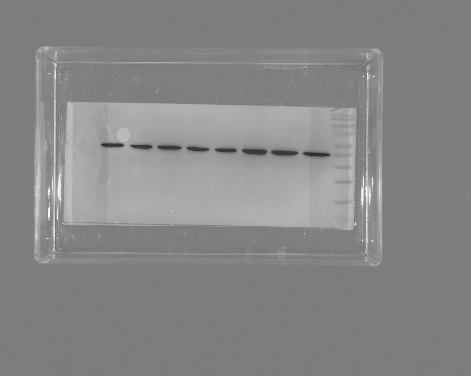
**

**Fig. 7H**

**







**

**Fig. 7L**

Supplement: Supplementary file 2 [file f1143ac521d6d7fbe3dab835.docx]
